# Supplementary material
Source: publisher site journal article supplement (http://content.karger.com/ProdukteDB/miscArchiv/000/181/158/Suppl.pdf)
Supplement: Supplementary file 1 [file Suppl.pdf]

**Supplementary table**

**Table S1.** List of candidate gene SNPs successfully genotyped. The gene name, chromosomal location, coordinates according to Build 35

(<http://www.ncbi.nlm.nih.gov/mapview/stats/BuildStats.cgi?taxid=9606&build=35&ver=1>),

SNP name, nucleotide variation, and location of the variation are indicated.

Syn=synonymous. Nonsyn=nonsynonymous

| Target Locus | Chr | Coordinates build 35 | SNP Name   | variation | variation type / Location other SNP name |                             |
|--------------|-----|----------------------|------------|-----------|------------------------------------------|-----------------------------|
| LEPR         | 1   | 65587872             | rs3790436  | C G       | intron of DNAJC6                         |                             |
| LEPR         | 1   | 65597378             | rs3806318  | A G       |                                          |                             |
| LEPR         | 1   | 65597590             | rs1327118  | C G       | promoter                                 | hCV3128062                  |
| LEPR         | 1   | 65598419             | rs3790435  | A G       | 5'UTR                                    | exon1 noncoding +64 T>C     |
| LEPR         | 1   | 65606363             | rs3790433  | A G       | intron (UTR)                             | intron of OBRGRP            |
| LEPR         | 1   | 65609972             | rs7602     | A G       | UTR (intron1)                            |                             |
| LEPR         | 1   | 65618511             | rs970468   | A C       |                                          |                             |
| LEPR         | 1   | 65647515             | rs6588147  | A G       | intron                                   | hCV29129972                 |
| LEPR         | 1   | 65661899             | rs2025805  | A G       | UTR (intron)                             |                             |
| LEPR         | 1   | 65671418             | rs1327120  | A G       | intron                                   |                             |
| LEPR         | 1   | 65681083             | rs2104563  | A G       | intron                                   | hCV16095921                 |
| LEPR         | 1   | 65688072             | rs1327116  | A C       |                                          |                             |
| LEPR         | 1   | 65699470             | rs1171276  | A G       |                                          |                             |
| LEPR         | 1   | 65705369             | rs1782754  | A G       |                                          |                             |
| LEPR         | 1   | 65747760             | rs3790432  | A T       | intron                                   | hCV518166                   |
| LEPR         | 1   | 65748462             | rs1137100  | A G       | coding (nonsyn)                          | Lys109Arg                   |
| LEPR         | 1   | 65755040             | rs3790426  | A C       | intron                                   |                             |
| LEPR         | 1   | 65755133             | rs3790425  | A G       | intron                                   |                             |
| LEPR         | 1   | 65756034             | rs3790424  | A G       | intron                                   |                             |
| LEPR         | 1   | 65759288             | rs1938487  | A G       | Intron                                   | hCV12108671                 |
| LEPR         | 1   |                      | rs1137101  | A G       | coding (nonsyn)                          | Gln223Arg                   |
| LEPR         | 1   | 65774346             | rs3828034  | A G       | intron                                   | hCV25597196                 |
| LEPR         | 1   | 65777010             | rs3790423  | A G       | intron                                   |                             |
| LEPR         | 1   | 65778020             | rs3790422  | A G       | intron                                   |                             |
|              |     |                      |            |           |                                          | (=rs1805134)<br>hCV11874781 |
| LEPR         | 1   | 65779130             | rs3790419  | A G       | coding (syn)                             | Ser343Ser                   |
| LEPR         | 1   | 65787973             | rs8179183  | C G       | coding (nonsyn)                          | Lys656Asn                   |
| LEPR         | 1   | 65793303             | rs1938484  | A C       | intron                                   |                             |
| LEPR         | 1   | 65797454             | rs3790437  | A G       | intron                                   | hCV26465953                 |
| LEPR         | 1   | 65797595             | rs3790439  | A T       | intron                                   | A>T-36 intron16             |
| LEPR         | 1   | 65814278             | rs1805096  | A G       | coding (syn)                             | Pro1019Pro                  |
| LEPR         | 1   | 65960323             | hCV1928197 | A G       | Intron                                   | hCV1928197                  |
| LEPR         | 1   | 66033405             | hCV1928241 | A G       | intron                                   | hCV1928241                  |
| LEPR         | 1   | 66102255             | hCV509173  | A G       | intron                                   | hCV509173                   |
| LEPR         | 1   | 166152822            | hCV429537  | A G       | intron                                   | hCV429537                   |
| POMC         | 2   | 25232815             | POMC236    | C G       | coding (cleavage site)                   | Arg236Gly                   |
| POMC         | 2   | 25232958             | POMC188    | A G       | coding (syn)                             | Glu188Gly                   |
| POMC         | 2   | 25288980             | rs2118404  | A G       | UTR of KIAA0953                          | 6kb downstream              |
| POMC         | 2   | 25292224             | rs1866146  | A G       | 3 flank                                  | 3kb downstream              |
| POMC         | 2   | 25293121             | rs4665285  | C G       | Intergenic                               | hCV11810742                 |

## Chung et al

|      |   |           |                |   |   |                     |                     |
|------|---|-----------|----------------|---|---|---------------------|---------------------|
| POMC | 2 | 25296484  | rs6713532      | A | G | intron              |                     |
| POMC | 2 | 25301804  | rs3769671      | A | C | UTR                 |                     |
| POMC | 2 | 25307663  | rs6719226      | C | G |                     | n/a                 |
| POMC | 2 | 25313931  | rs874401       | A | G |                     |                     |
| GCG  | 2 | 162816754 | rs2389681      | A | C | Locus               |                     |
| GCG  | 2 | 162823210 | rs1990761      | A | G | Locus               |                     |
| GCG  | 2 | 162827605 | rs5650         | A | G | coding (nonsyn)     | Val115Ala           |
| GCG  | 2 | 162830665 | rs5647         | A | G | intron              |                     |
| GCG  | 2 | 162831181 | rs5645         | A | G | coding (syn)        | Tyr5Tyr             |
| GCG  | 2 | 162836742 | rs3761656      | A | C | Locus               |                     |
| BBS5 | 2 | 169784512 | BBS5_SNP2      | A | G |                     |                     |
| BBS5 | 2 | 169797992 | BBS5_A-Gsplice | A | G |                     | A-G splice          |
| BBS5 | 2 | 169798749 | BBS5_N184S     | A | G |                     | N184S               |
| BBS5 | 2 | 169802608 | BBS5_R207H     | A | G |                     | R207H               |
| BBS5 | 2 | 169809235 | BBS5_SNP5      | C | G |                     |                     |
| BBS5 | 2 | 170164316 | rs16823066     | A | G |                     |                     |
| GHRL | 3 | 10303250  | rs35683        | A | C | intron              |                     |
| GHRL | 3 | 10303453  | rs4684677      | A | T | coding(nonsyn)      | Gln90Leu            |
| GHRL | 3 | 10303782  | rs35682        | A | G | intron              |                     |
| GHRL | 3 | 10306457  | rs696217       | A | C | coding (nonsyn)     | Leu72Met            |
| GHRL | 3 | 10307468  | rs27647        | A | G | promoter 5'UTR      |                     |
| GHRL | 3 | 10307858  | rs26312        | A | G | locus               |                     |
| GHRL | 3 | 10308364  | rs3755777      | C | G | locus               |                     |
| GHRL | 3 | 10311291  | rs1629816      | A | G | locus               |                     |
| BBS3 | 3 | 98996956  | rs10511163     | A | G |                     |                     |
| BBS3 | 3 | 98999808  | rs4857294      | C | G |                     |                     |
| BBS3 | 3 | 99131522  | BBS3_T31R      | C | G |                     |                     |
| BBS3 | 3 | 99132552  | BBS3_SNP2      | A | C |                     |                     |
| BBS3 | 3 | 99144132  | BBS3_SNP3      | A | T |                     |                     |
| BBS3 | 3 | 99148229  | BBS3_SNP4      | A | G |                     |                     |
| BBS3 | 3 | 99155120  | BBS3_G169A     | C | G |                     | G169A               |
| GHSR | 3 | 173636722 | rs560994       | A | T | n/a                 |                     |
| GHSR | 3 | 173639812 | rs558572       | A | G | locus               |                     |
| GHSR | 3 | 173641099 | rs1403637      | A | G | intergenic          | hCV2169202          |
| GHSR | 3 | 173641907 | rs4144707      | A | G | locus               |                     |
| GHSR | 3 | 173648429 | rs572169       | A | G | coding (syn)        | Arg159Arg           |
| GHSR | 3 | 173648735 | rs495225       | A | G | coding (syn)        | hCV1079488 Gly57Gly |
| GHSR | 3 | 173649963 | rs2922126      | A | T | locus               |                     |
| GHSR | 3 | 173655071 | rs11918879     | A | G | n/a                 |                     |
| GHSR | 3 | 173657776 | rs863441       | C | G | n/a                 |                     |
| APM1 | 3 | 188001838 | rs1648703      | A | C | Intron of RFC4      |                     |
| APM1 | 3 | 188032397 | rs10937273     | A | G | Intron of LOC389184 |                     |
| APM1 | 3 | 188038739 | rs822387       | A | G |                     |                     |
| APM1 | 3 | 188042176 | rs266729       | C | G | promoter            | -11377G/C           |
| APM1 | 3 | 188043484 | rs182052       | A | G | intron1             |                     |
| APM1 | 3 | 188049028 | rs822393       | A | G | intron1             |                     |
| APM1 | 3 | 188049430 | rs822394       | A | C | intron1-4kbofATG    |                     |
| APM1 | 3 | 188049509 | rs822395       | A | C | intron1-4kbofATG    | -4041(-4034)A/C     |
| APM1 | 3 | 188049579 | rs822396       | A | G | intron1-4kbofATG    | -3971(-3964)A/G     |
|      |   |           |                |   |   |                     | hCV26426077 +45T/G  |
| APM1 | 3 | 188053594 | rs2241766      | A | C | coding(syn)         | Gly15Gly            |
| APM1 | 3 | 188053825 | rs1501299      | A | C | intron              | +276G/TIVS2+62G/T   |
| APM1 | 3 | 188053898 | rs2241767      | A | G | intron              | +349A/G             |
| APM1 | 3 | 188054261 | rs3774261      | A | G | intron              | hCV27479710 +712G/A |
| APM1 | 3 | 188054516 | rs3774262      | A | G | intron              |                     |

## Chung et al

|                 |   |           |             |   |   |                  |             |
|-----------------|---|-----------|-------------|---|---|------------------|-------------|
| <i>APM1</i>     | 3 | 188203912 | APM11426    | A | G | promoter         | -11426A/G   |
| <i>APM1</i>     | 3 | 188216580 | APM111      | A | G | coding(nonsyn)   | Tyr111His   |
| <i>APM1</i>     | 3 | 188225331 | hCV26426064 | A | G | Intergenic       | hCV26426064 |
| <i>BBS7</i>     | 4 | 123006030 | BBS7_SNP6   | A | G |                  |             |
| <i>BBS7</i>     | 4 | 123032434 | BBS7_T211I  | A | G |                  | T211I       |
| <i>BBS7</i>     | 4 | 123039368 | BBS7_SNP3   | A | G |                  |             |
| <i>BBS7</i>     | 4 | 123048090 | BBS7_SNP2   | C | G |                  |             |
| <i>NPY5R</i>    | 4 | 164410779 | Y5R1c52     | A | G | UTR              |             |
| <i>NPY1R</i>    | 4 | 164599697 | rs1574637   | A | G | n/a              |             |
| <i>NPY1R</i>    | 4 | 164602658 | rs4057797   | A | T | locus (1R)       |             |
| <i>NPY1R</i>    | 4 | 164603010 | rs9764      | A | G | UTR              |             |
| <i>NPY1R</i>    | 4 | 164604094 | rs5578      | A | C | coding (nonsyn)  | Thr374Lys   |
| <i>NPY1R-5R</i> | 4 | 164614340 | rs6837793   | A | G | n/a              |             |
| <i>NPY1R-5R</i> | 4 | 164617881 | rs4234955   | A | G | n/a              |             |
| <i>NPY5R</i>    | 4 | 164629142 | rs3967767   | A | G | coding (nonsyn)  | Asn38Asp    |
| <i>NPY5R</i>    | 4 | 164630308 | rs11946004  | A | G | coding (syn)     | Gly426Gly   |
| <i>NPY5R</i>    | 4 | 164634502 | rs6536721   | A | G | n/a              |             |
| <i>NPY5R</i>    | 4 | 164637636 | rs6826217   | A | T | n/a              |             |
| <i>CPE</i>      | 4 | 166668633 | rs1438109   | A | T | intron           | hCV7508762  |
| <i>CPE</i>      | 4 | 166671752 | rs1866217   | A | G | intron           |             |
| <i>CPE</i>      | 4 | 166673330 | rs6536912   | A | G | intron           |             |
| <i>CPE</i>      | 4 | 166677307 | rs1543915   | A | G |                  |             |
| <i>CPE</i>      | 4 | 166682032 | rs2164864   | A | G | intron           | hCV11243588 |
| <i>CPE</i>      | 4 | 166689657 | rs1866221   | A | T | intron           | hCV11243570 |
| <i>CPE</i>      | 4 | 166698564 | rs1946816   | A | C | intron           |             |
| <i>CPE</i>      | 4 | 166710108 | rs7699489   | A | G | intron           |             |
| <i>CPE</i>      | 4 | 166716498 | rs1370679   | A | G | intron           | hCV9460984  |
| <i>CPE</i>      | 4 | 166717026 | rs4481204   | A | G | intron           |             |
| <i>CPE</i>      | 4 | 166720355 | rs1898593   | A | C | intron           |             |
| <i>CPE</i>      | 4 | 166727266 | rs6841638   | A | C | intron           |             |
| <i>CPE</i>      | 4 | 166733682 | rs2118494   | A | G | intron           | hCV1582141  |
| <i>CPE</i>      | 4 | 166739184 | rs1001045   | C | G | intron           |             |
| <i>CPE</i>      | 4 | 166744549 | rs3775311   | A | G | intron           |             |
| <i>CPE</i>      | 4 | 166747960 | rs1370687   | A | G | intron           |             |
| <i>CPE</i>      | 4 | 166753827 | rs1583646   | A | G | intron           |             |
| <i>CPE</i>      | 4 | 166761179 | rs2289230   | A | G | intron           | hCV11252059 |
| <i>CPE</i>      | 4 | 166763405 | rs2304592   | A | G | intron           |             |
| <i>CPE</i>      | 4 | 166766387 | rs3822062   | A | C | intron           | hCV11252065 |
| <i>CPE</i>      | 4 | 166774248 | rs7692951   | A | G | intron           |             |
| <i>CPE</i>      | 4 | 166777043 | rs12200     | A | G | UTR              |             |
| <i>CPE</i>      | 4 | 166785899 | rs2280322   | A | C | n/a              | hCV11252077 |
| <i>CARTPT</i>   | 5 | 71003920  | CART3       | A | G | UTR (+39bp STOP) |             |
| <i>CARTPT</i>   | 5 | 71042167  | rs2320165   | A | G | n/a              |             |
| <i>CARTPT</i>   | 5 | 71049233  | rs3763154   | A | G | locus            | hCV1561338  |
| <i>CARTPT</i>   | 5 | 71049590  | rs10515114  | A | G | locus            |             |
| <i>CARTPT</i>   | 5 | 71049720  | rs3857384   | A | G | locus            |             |
| <i>CARTPT</i>   | 5 | 71059197  | rs6874941   | A | G | n/a              | hCV1561333  |
| <i>GLP1R</i>    | 6 | 39115518  | rs7738586   | A | C |                  |             |
| <i>GLP1R</i>    | 6 | 39118941  | rs9380825   | A | G | Locus            |             |
| <i>GLP1R</i>    | 6 | 39124335  | rs880067    | A | G | n/a              | hCV8948755  |
| <i>GLP1R</i>    | 6 | 39128520  | rs2268657   | A | G | intron           |             |
| <i>GLP1R</i>    | 6 | 39132734  | rs2143734   | A | G | intron           |             |
| <i>GLP1R</i>    | 6 | 39137812  | rs742764    | A | G | intron           | hCV330391   |
| <i>GLP1R</i>    | 6 | 39138379  | rs2268650   | A | G | intron           | hCV2491167  |
| <i>GLP1R</i>    | 6 | 39140393  | rs910170    | A | G | intron           | hCV2491162  |

## Chung et al

|              |   |           |            |   |   |                 |                                  |
|--------------|---|-----------|------------|---|---|-----------------|----------------------------------|
| <i>GLP1R</i> | 6 | 39141109  | rs910167   | A | G | intron          |                                  |
| <i>GLP1R</i> | 6 | 39142050  | rs6923761  | A | G | coding (nonsyn) | Ser168Gly                        |
| <i>GLP1R</i> | 6 | 39148632  | rs2235868  | A | C | coding (syn)    | Arg176Arg                        |
|              |   |           |            |   |   |                 | hCV2491143                       |
| <i>GLP1R</i> | 6 | 39149480  | rs1042044  | A | C | coding (nonsyn) | Phe260Leu                        |
| <i>GLP1R</i> | 6 | 39150312  | rs932443   | A | G | intron          | hCV2491141                       |
| <i>GLP1R</i> | 6 | 39151156  | rs2268647  | A | G | intron          | hCV2491138                       |
| <i>GLP1R</i> | 6 | 39151970  | rs2268645  | A | G | intron          |                                  |
| <i>GLP1R</i> | 6 | 39156469  | rs8192681  | A | C | coding (syn)    | Ile400Ile                        |
| <i>GLP1R</i> | 6 | 39158244  | rs2268641  | A | G | intron          | hCV2491125                       |
| <i>GLP1R</i> | 6 | 39158362  | rs2268640  | A | G | intron          | hCV2491124                       |
| <i>GLP1R</i> | 6 | 39159672  | rs2268635  | A | G | intron          |                                  |
| <i>GLP1R</i> | 6 | 39161166  | rs2235866  | A | G | intron          | hCV15953203                      |
| <i>GLP1R</i> | 6 | 39163463  | rs4714210  | A | G | UTR             |                                  |
| <i>GLP1R</i> | 6 | 39169474  | rs2143733  | A | C | UTR             |                                  |
| <i>CNR1</i>  | 6 | 88902668  | rs806365   | A | G | n/a             | hCV1652594                       |
| <i>CNR1</i>  | 6 | 88904154  | rs7766029  | A | G | n/a             |                                  |
| <i>CNR1</i>  | 6 | 88904308  | rs806366   | A | G | n/a             |                                  |
| <i>CNR1</i>  | 6 | 88906819  | rs806368   | A | G | UTR             |                                  |
|              |   |           |            |   |   |                 | hCV1652590                       |
| <i>CNR1</i>  | 6 | 88910354  | rs1049353  | A | G | coding (syn)    | Thr392(453)Thr                   |
| <i>CNR1</i>  | 6 | 88913082  | rs806371   | A | C | locus           |                                  |
| <i>CNR1</i>  | 6 | 88915442  | rs806377   | A | G | intron ?        | hCV1652585                       |
| <i>CNR1</i>  | 6 | 88916270  | rs806378   | A | G | n/a             |                                  |
| <i>CNR1</i>  | 6 | 88921372  | rs806380   | A | G | intron          | hCV1652583                       |
| <i>CNR1</i>  | 6 | 88929649  | rs6454674  | A | C | n/a             | hCV11418433                      |
| <i>LEP</i>   | 7 | 127460064 | rs791601   | A | C | intergenic      | H1328090-15.3kb                  |
| <i>LEP</i>   | 7 | 127466943 | rs791608   | A | G |                 |                                  |
| <i>LEP</i>   | 7 | 127472049 | rs12535708 | A | C | 5'flank/TFBS    | H1328082-3.3kb                   |
| <i>LEP</i>   | 7 | 127472218 | rs11770725 | A | G | 5'flank/TFBS    | H1328081-3.1kb                   |
|              |   |           |            |   |   |                 | hCV15966471 exon1<br>+19G>A A19G |
| <i>LEP</i>   | 7 | 127475300 | rs2167270  | A | G |                 |                                  |
| <i>LEP</i>   | 7 | 127475802 | rs2278815  | A | G | UTR             |                                  |
| <i>LEP</i>   | 7 | 127481090 | rs12706832 | A | G | intron1         | H1432615                         |
| <i>LEP</i>   | 7 | 127482640 | rs10244329 | A | T | intron1         | H1328076                         |
| <i>LEP</i>   | 7 | 127484013 | rs11763517 | A | G | intron1         | H3001671                         |
| <i>LEP</i>   | 7 | 127485391 | rs10954173 | A | G | intron1         | C1328073                         |
| <i>LEP</i>   | 7 | 127486166 | rs1800583  | A | G | coding(Syn)     | hCV11609920 Thr48Thr             |
| <i>LEP</i>   | 7 | 127486931 | rs2071045  | A | G | intronIVS2      |                                  |
| <i>LEP</i>   | 7 | 127488256 | rs3828942  | A | G | intronIVS2-152  |                                  |
| <i>LEP</i>   | 7 | 127493080 | rs2060715  | A | G | 3flank          | hCV3001667 +4.2kb                |
| <i>LEP</i>   | 7 | 127511684 | H1328083   | A | G | 5'flank/TFBS    | H1328083-3.6kb                   |
| <i>LEP</i>   | 7 | 127512207 | hCV1328081 | A | G | Intergenic      | hCV1328081 -3.1kb                |
| <i>LEP</i>   | 7 | 127514638 | LEP633     | A | G | UTR             | C-633T-0.7kb                     |
| <i>LEP</i>   | 7 | 127522868 | hCV1328075 | A | G | intron          | hCV1328075                       |
| <i>LEP</i>   | 7 | 127528791 | LEPUTR     | A | G | 3'UTR           | 33bp after TGA C>T               |
| <i>LEP</i>   | 7 | 127531017 | hCV1328071 | A | C | UTR3            | hCV1328071+2.2kb                 |
| <i>LEP</i>   | 7 | 127533304 | hCV3001666 | A | G | Intergenic      | hCV3001666 +4.5kb                |
| <i>JAK2</i>  | 9 | 4969730   | rs1887427  | A | G | n/a             |                                  |
| <i>JAK2</i>  | 9 | 4973311   | rs3808850  | A | T | n/a             |                                  |
| <i>JAK2</i>  | 9 | 4975542   | rs2274472  | A | G | UTR             |                                  |
| <i>JAK2</i>  | 9 | 4975879   | rs2274471  | A | G | UTR             |                                  |
| <i>JAK2</i>  | 9 | 4983082   | rs1327493  | C | G | UTR             |                                  |
| <i>JAK2</i>  | 9 | 5039065   | rs1328917  | A | C | intron          |                                  |
| <i>JAK2</i>  | 9 | 5040706   | rs2230722  | A | G | coding (syn)    | His163His                        |

## Chung et al

|       |    |          |            |   |   |                 |                     |
|-------|----|----------|------------|---|---|-----------------|---------------------|
| JAK2  | 9  | 5045434  | rs1536800  | A | G | intron          |                     |
| JAK2  | 9  | 5055003  | rs2230723  | C | G | coding (nonsyn) | Leu Val             |
| JAK2  | 9  | 5058520  | rs3780365  | A | G | intron          |                     |
| JAK2  | 9  | 5071780  | rs2230724  | A | G | coding (syn)    | rs7048717 Leu830Leu |
| JAK2  | 9  | 5073173  | rs1410779  | A | G | intron          |                     |
| JAK2  | 9  | 5081675  | rs3824432  | A | G | intron          |                     |
| JAK2  | 9  | 5087544  | rs3780372  | A | G | intron          |                     |
| JAK2  | 9  | 5099531  | rs10491652 | A | G | intron          |                     |
| JAK2  | 9  | 5102519  | rs3780379  | A | G | intron          |                     |
| JAK2  | 9  | 5111070  | rs966871   | A | T | intron          |                     |
| TUB   | 11 | 8009735  | rs4758272  | A | G | n/a             |                     |
| TUB   | 11 | 8013375  | rs2178152  | A | G |                 |                     |
| TUB   | 11 | 8018502  | rs1406094  | A | C | intron          |                     |
| TUB   | 11 | 8024027  | rs2141322  | A | G | intron          |                     |
| TUB   | 11 | 8029812  | rs7949880  | A | G | intron          |                     |
| TUB   | 11 | 8035280  | rs11041723 | A | C | intron          |                     |
| TUB   | 11 | 8039305  | rs2280726  | A | G | intron          |                     |
| TUB   | 11 | 8046522  | rs7114018  | A | G | intron          |                     |
| TUB   | 11 | 8048000  | rs1881240  | C | G | intron          |                     |
| TUB   | 11 | 8051258  | rs1406095  | A | G | intron          |                     |
| TUB   | 11 | 8054010  | rs3794018  | A | G | intron          |                     |
| TUB   | 11 | 8057749  | rs4758040  | A | G | intron          |                     |
| TUB   | 11 | 8072275  | rs4758289  | A | G | coding (syn)    | Gly120(175)Gly      |
| TUB   | 11 | 8074679  | rs2242501  | A | G | intron          |                     |
| TUB   | 11 | 8075048  | rs2242503  | A | G | intron          |                     |
| TUB   | 11 | 8082818  | rs3750955  | A | G | UTR             |                     |
| TUB   | 11 | 8084071  | rs1055233  | A | G | UTR             |                     |
| TUB   | 11 | 8089461  | rs1569128  | A | T | intron of RIC3  |                     |
| BBS1  | 11 | 66014368 | BBS1_SNP1  | A | G |                 |                     |
| BBS1  | 11 | 66016028 | BBS1_SNP2  | A | G |                 |                     |
| BBS1  | 11 | 66026525 | BBS1_SNP5  | C | G |                 |                     |
| BBS1  | 11 | 66031444 | BBS1_M390R | A | C |                 |                     |
| BBS1  | 11 | 66038671 | rs2298806  | A | G |                 |                     |
| BBS1  | 11 | 66039833 | rs2276406  | A | G |                 |                     |
| BBS1  | 11 | 66050355 | rs3819247  | A | G |                 |                     |
| BBS1  | 11 | 66053939 | rs3816492  | A | G |                 |                     |
| BBS1  | 11 | 66056924 | rs3741360  | A | G |                 |                     |
| HTR2A | 13 | 46307035 | rs6314     | A | G | coding (nonsyn) | Tyr452His           |
| HTR2A | 13 | 46307127 | rs1058576  | A | G | coding (nonsyn) | Phe421Ser           |
| HTR2A | 13 | 46309662 | rs1923882  | A | G | intron          | hCV11696918         |
| HTR2A | 13 | 46313002 | rs977003   | A | C | intron          |                     |
| HTR2A | 13 | 46317578 | rs3742278  | A | G | intron          |                     |
| HTR2A | 13 | 46319837 | rs1923884  | A | G | intron          | hCV11696916         |
| HTR2A | 13 | 46321087 | rs1923885  | A | G | Intron          | hCV1619744          |
| HTR2A | 13 | 46322813 | rs1745837  | A | G | intron          |                     |
| HTR2A | 13 | 46324723 | rs9316232  | A | G | intron          |                     |
| HTR2A | 13 | 46326472 | rs2296972  | A | C | intron          |                     |
| HTR2A | 13 | 46326612 | rs643627   | A | G | intron          | hCV2711061          |
| HTR2A | 13 | 46328480 | rs2246127  | A | G | intron          |                     |
| HTR2A | 13 | 46335217 | rs1928042  | A | C | intron          |                     |
| HTR2A | 13 | 46338561 | rs2770296  | A | G | intron          |                     |
| HTR2A | 13 | 46343704 | rs9316235  | A | G | intron          |                     |
| HTR2A | 13 | 46343878 | rs582854   | A | C | intron          |                     |
| HTR2A | 13 | 46343995 | rs582385   | A | G | intron          |                     |
| HTR2A | 13 | 46345237 | rs1928040  | A | G | intron          |                     |

## Chung et al

|              |    |          |            |   |   |                 |                               |
|--------------|----|----------|------------|---|---|-----------------|-------------------------------|
| <i>HTR2A</i> | 13 | 46349287 | rs912127   | A | G | intron          |                               |
| <i>HTR2A</i> | 13 | 46353864 | rs985933   | A | G | intron          |                               |
| <i>HTR2A</i> | 13 | 46354052 | rs927544   | A | G | intron          |                               |
| <i>HTR2A</i> | 13 | 46362858 | rs4941573  | A | G | intron          |                               |
| <i>HTR2A</i> | 13 | 46364450 | rs2070035  | A | C | intron          |                               |
| <i>HTR2A</i> | 13 | 46365627 | rs2070040  | A | G | intron          |                               |
| <i>HTR2A</i> | 13 | 46367941 | rs6313     | A | G | coding (syn)    | hCV3042197 102T/C<br>Ser34Ser |
| <i>HTR2A</i> | 13 | 46369479 | rs6311     | A | G | UTR             | hCV8695278 -1438G/A           |
| <i>HTR2A</i> | 13 | 46371551 | rs4142900  | A | C | UTR             |                               |
| <i>HTR2A</i> | 13 | 46371922 | rs9534512  | A | C | UTR             | hCV3042190                    |
| <i>HTR2A</i> | 13 | 46376345 | rs2149434  | A | C | UTR             |                               |
| <i>HTR2A</i> | 13 | 46381178 | rs2026690  | A | C | UTR             |                               |
| <i>HTR2A</i> | 13 | 46387077 | rs1410659  | A | G | UTR             |                               |
| <i>BBS8</i>  | 14 | 88377073 | rs17700296 | A | G |                 |                               |
| <i>BBS8</i>  | 14 | 88388987 | rs2273657  | A | G |                 |                               |
| <i>BBS8</i>  | 14 | 88402295 | rs17124926 | A | G |                 |                               |
| <i>BBS8</i>  | 14 | 89494213 | BBS8_SNP5  | A | G |                 |                               |
| <i>BBS4</i>  | 15 | 70816321 | rs2277596  | A | G |                 | Met472Val                     |
| <i>BBS4</i>  | 15 | 70834939 | BBS4_SNP1  | A | G |                 |                               |
| <i>BBS4</i>  | 15 | 70836841 | BBS4_SNP3  | A | G |                 |                               |
| <i>BBS4</i>  | 15 | 70863028 | BBS4_SNP4  | A | G |                 |                               |
| <i>BBS4</i>  | 15 | 70867497 | BBS4_SNP5  | A | G |                 |                               |
| <i>BBS4</i>  | 15 | 70885766 | BBS4_SNP6  | A | G |                 |                               |
| <i>BBS4</i>  | 15 | 70888063 | BBS4_SNP7  | A | G |                 |                               |
| <i>PLIN</i>  | 15 | 87999043 | rs11637802 | A | G | n/a             |                               |
| <i>PLIN</i>  | 15 | 88009314 | rs1052700  | A | T | UTR             |                               |
| <i>PLIN</i>  | 15 | 88012827 | rs894160   | A | G | intron          |                               |
| <i>PLIN</i>  | 15 | 88014138 | rs2304794  | A | T | intron          |                               |
| <i>PLIN</i>  | 15 | 88014233 | rs6496589  | C | G | coding (nonsyn) | Pro194Ala                     |
| <i>PLIN</i>  | 15 | 88018100 | rs2289487  | A | G | intron          |                               |
| <i>PLIN</i>  | 15 | 88088686 | Plin82     | A | G | coding (nonsyn) | Thr82Ile                      |
| <i>PLIN</i>  | 15 | 88088812 | Plin40     | C | G | coding (nonsyn) | Thr40Ser                      |
| <i>BBS2</i>  | 16 | 53854869 | BBS2_SNP7  | A | G |                 |                               |
| <i>BBS2</i>  | 16 | 53868279 | BBS2_T560I | A | G |                 |                               |
| <i>BBS2</i>  | 16 | 53870304 | BBS2_SNP5  | A | C |                 |                               |
| <i>BBS2</i>  | 16 | 53876482 | BBS2_SNP4  | A | G |                 |                               |
| <i>BBS2</i>  | 16 | 53876690 | BBS2_SNP3  | C | G |                 |                               |
| <i>BBS2</i>  | 16 | 53881675 | BBS2_SNP2  | A | G |                 |                               |
| <i>BBS2</i>  | 16 | 53884899 | BBS2_D104A | A | C |                 |                               |
| <i>BBS2</i>  | 16 | 53890618 | BBS2_SNP1  | A | G |                 |                               |
| <i>AGRP</i>  | 16 | 66074446 | rs5030980  | A | G | coding (nonsyn) | 760G/A Thr67Ala               |
| <i>AGRP</i>  | 16 | 66074556 | rs11575892 | A | G | intron          | 650 C/T                       |
| <i>STAT3</i> | 17 | 37713088 | rs2272087  | A | G | intron          |                               |
| <i>STAT3</i> | 17 | 37713263 | rs16967659 | A | G | coding (syn)    | Asp634Asp                     |
| <i>STAT3</i> | 17 | 37719142 | rs1053023  | A | G | n/a             |                               |
| <i>STAT3</i> | 17 | 37719436 | rs1053005  | A | G | n/a             |                               |
| <i>STAT3</i> | 17 | 37719618 | rs1053004  | A | G | n/a             |                               |
| <i>STAT3</i> | 17 | 37735055 | rs2293152  | C | G | intron          |                               |
| <i>STAT3</i> | 17 | 37743267 | rs12721576 | C | G | intron          |                               |
| <i>STAT3</i> | 17 | 37745206 | rs2306580  | C | G | intron          |                               |
| <i>STAT3</i> | 17 | 37746413 | rs3869550  | A | G | intron          |                               |
| <i>STAT3</i> | 17 | 37748428 | rs8069645  | A | G | intron          |                               |
| <i>STAT3</i> | 17 | 37751799 | rs3816769  | A | G | intron          |                               |
| <i>STAT3</i> | 17 | 37753791 | rs2306581  | A | C | intron          |                               |

## Chung et al

|       |    |           |             |   |   |                  |                     |
|-------|----|-----------|-------------|---|---|------------------|---------------------|
| STAT3 | 17 | 37755105  | rs6503697   | A | T | UTR              |                     |
| STAT3 | 17 | 37767727  | rs744166    | A | G | UTR              |                     |
| STAT3 | 17 | 37773451  | rs957971    | C | G | UTR              |                     |
| STAT3 | 17 | 37783361  | rs1026916   | A | G | UTR              |                     |
| STAT3 | 17 | 37794757  | rs12721585  | A | C | locus            |                     |
| STAT3 | 17 | 37795736  | rs4796793   | C | G | locus            |                     |
| SOCS3 | 17 | 73855196  | rs11077357  | C | G | n/a              |                     |
| SOCS3 | 17 | 73861445  | rs8069976   | A | C | n/a              |                     |
| SOCS3 | 17 | 73865388  | rs4969168   | A | G | locus            |                     |
| SOCS3 | 17 | 73866399  | rs1061489   | A | G | coding (nonsyn)  | Tyr125His           |
| SOCS3 | 17 | 73872133  | rs4969170   | A | G | UTR of LOC388421 |                     |
| SOCS3 | 17 | 73876088  | rs8074003   | A | G |                  |                     |
| MC4R  | 18 | 56074460  | rs1379444   | A | C | Intergenic       | hCV26141745         |
| MC4R  | 18 | 56076486  | rs8085887   | A | C | Intergenic       | hCV1659552          |
| MC4R  | 18 | 56160406  | rs1943214   | A | G |                  |                     |
| MC4R  | 18 | 56170414  | hCV2747897  | A | G | Intergenic       | hCV2747897          |
| MC4R  | 18 | 56191823  | hCV27864867 | A | C | coding (nonsyn)  | L251I Leu251Ile     |
| MC4R  | 18 | 56192751  | MC4R178     | A | C | promoter         | -178A/C             |
| MC4R  | 18 | 56195804  | rs1943220   | A | G |                  |                     |
| MC4R  | 18 | 56202634  | rs1943223   | A | G | Intergenic       | hCV11962324 +12.1kb |
| MC4R  | 18 | 56245389  | rs1943232   | A | G |                  |                     |
| MC4R  | 18 | 56251779  | rs1539984   | A | G |                  |                     |
| BBS6  | 20 | 10286678  | BBS6_SNP5   | A | G |                  |                     |
| BBS6  | 20 | 10287159  | BBS6_SNP4   | A | G |                  |                     |
| BBS6  | 20 | 10294262  | BBS6_SNP2   | A | C |                  |                     |
| BBS6  | 20 | 10294539  | BBS6_A242S  | A | C |                  |                     |
| BBS6  | 20 | 10297201  | BBS6_SNP1   | A | G |                  |                     |
| HTR2C | X  | 113641096 | rs498207    | A | G | locus            |                     |
| HTR2C | X  | 113641562 | rs518147    | C | G | UTR              |                     |
| HTR2C | X  | 113643340 | rs569959    | A | G | UTR              |                     |
| HTR2C | X  | 113644329 | rs539748    | A | G | UTR              |                     |
| HTR2C | X  | 113647670 | rs498177    | A | G | UTR              |                     |
| HTR2C | X  | 113668627 | rs12558586  | A | T | Intron, UTR      | hCV339374           |
| HTR2C | X  | 113699082 | rs7055144   | A | G | UTR              |                     |
| HTR2C | X  | 113714753 | rs2192372   | A | G | UTR              |                     |
| HTR2C | X  | 113719806 | rs11798698  | A | C | UTR              |                     |
| HTR2C | X  | 113723589 | rs12844109  | A | G | Intron, UTR      | hCV2672776          |
| HTR2C | X  | 113742127 | rs2069237   | A | G | UTR              | hCV15858653         |
| HTR2C | X  | 113787202 | rs2497543   | A | G | intron           | hCV346619           |
| HTR2C | X  | 113788715 | rs6318      | C | G | coding (nonsyn)  | Ser23Cys            |
| HTR2C | X  | 113820006 | rs2497523   | A | G | intron           | hCV15890899         |
| HTR2C | X  | 113820120 | rs4911871   | A | G | intron           |                     |
| HTR2C | X  | 113821110 | rs2497522   | A | G | intron           |                     |
| HTR2C | X  | 113829656 | rs2497514   | A | G | intron           | hCV15890836         |
| HTR2C | X  | 113961124 | rs1414334   | C | G | intron           |                     |
| HTR2C | X  | 113963553 | rs1360852   | A | G | intron           |                     |

**Table S2.** SNPs associated with adiposity in the Yup'ik participants. The p-values without testing for multiple correction are listed. If not indicated, p-values were not statistically significant at level of 0.05. **None of the p-values translated to FDR values below 0.05.**

| <i>Gene</i>   | <i>SNP Name</i> | <i>Chromosome</i> | <i>Map</i> | <i>percent body fat</i> | <i>triceps skinfold</i> | <i>abdominal skinfold</i> | <i>BMI</i>   | <i>Sub-scapular -skinfold</i> | <i>thigh skinfold</i> | <i>waist circum</i> | <i>Composite Score</i> |
|---------------|-----------------|-------------------|------------|-------------------------|-------------------------|---------------------------|--------------|-------------------------------|-----------------------|---------------------|------------------------|
| <i>ADIPOQ</i> | rs1648703       | 3                 | 188001838  | <b>0.008</b>            | 0.080                   | 0.066                     | 0.256        | <b>0.047</b>                  | <b>0.036</b>          | <b>0.023</b>        | <b>0.033</b>           |
| <i>ADIPOQ</i> | rs10937273      | 3                 | 188032397  | <b>0.031</b>            | 0.060                   | 0.302                     | 0.482        | <b>0.048</b>                  | 0.430                 | <b>0.019</b>        | 0.180                  |
| <i>ADIPOQ</i> | rs182052        | 3                 | 188043484  | 0.088                   | <b>0.044</b>            | 0.101                     | <b>0.029</b> | 0.136                         | 0.105                 | 0.181               | <b>0.038</b>           |
| <i>ADIPOQ</i> | rs3774261       | 3                 | 188054261  | <b>0.003</b>            | <b>0.007</b>            | <b>0.006</b>              | <b>0.044</b> | <b>0.003</b>                  | <b>0.006</b>          | <b>0.002</b>        | <b>0.019</b>           |
| <i>ARL6</i>   | rs4857294       | 3                 | 98999808   | <b>0.014</b>            | 0.068                   | <b>0.002</b>              | <b>0.012</b> | 0.275                         | 0.674                 | 0.200               | 0.053                  |
| <i>BBS4</i>   | BBS4_SNP4       | 15                | 70863028   | 0.062                   | 0.316                   | 0.710                     | 0.453        | 0.324                         | <b>0.049</b>          | 0.463               | 0.114                  |
| <i>BBS5</i>   | BBS5_SNP5       | 2                 | 169809235  | 0.204                   | 0.101                   | 0.174                     | <b>0.018</b> | <b>0.047</b>                  | 0.201                 | <b>0.023</b>        | 0.061                  |
| <i>CNR1</i>   | rs806365        | 6                 | 88902668   | 0.726                   | 0.376                   | <b>0.045</b>              | 0.235        | 0.667                         | 0.484                 | 0.098               | 0.301                  |
| <i>CNR1</i>   | rs806378        | 6                 | 88916270   | 0.941                   | 0.590                   | 0.903                     | 0.869        | 0.769                         | 0.626                 | <b>0.012</b>        | 0.868                  |
| <i>CNR1</i>   | rs806380        | 6                 | 88921372   | 0.804                   | 0.753                   | 0.952                     | 0.478        | 0.793                         | 0.664                 | <b>0.004</b>        | 0.603                  |
| <i>CPE</i>    | rs2164864       | 4                 | 166682032  | 0.173                   | 0.624                   | 0.356                     | 0.236        | 0.079                         | <b>0.037</b>          | 0.228               | 0.171                  |
| <i>CPE</i>    | rs1898593       | 4                 | 166720355  | <b>0.030</b>            | 0.133                   | <b>0.014</b>              | <b>0.019</b> | <b>0.011</b>                  | <b>0.037</b>          | <b>0.013</b>        | <b>0.022</b>           |
| <i>CPE</i>    | rs6841638       | 4                 | 166727266  | 0.122                   | 0.117                   | <b>0.015</b>              | <b>0.039</b> | 0.101                         | 0.389                 | <b>0.045</b>        | <b>0.039</b>           |
| <i>CPE</i>    | rs2118494       | 4                 | 166733682  | <b>0.026</b>            | 0.090                   | <b>0.012</b>              | <b>0.019</b> | <b>0.008</b>                  | <b>0.023</b>          | <b>0.008</b>        | <b>0.010</b>           |
| <i>CPE</i>    | rs3775311       | 4                 | 166744549  | 0.485                   | 0.110                   | <b>0.042</b>              | 0.072        | 0.476                         | 0.140                 | 0.313               | 0.164                  |
| <i>CPE</i>    | rs1370687       | 4                 | 166747960  | 0.125                   | 0.097                   | <b>0.037</b>              | <b>0.050</b> | 0.055                         | 0.064                 | 0.104               | <b>0.033</b>           |
| <i>CPE</i>    | rs2304592       | 4                 | 166763405  | 0.105                   | 0.067                   | 0.256                     | 0.453        | <b>0.025</b>                  | <b>0.014</b>          | 0.418               | 0.160                  |
| <i>CPE</i>    | rs7692951       | 4                 | 166774248  | <b>0.037</b>            | <b>0.029</b>            | <b>0.046</b>              | 0.293        | <b>0.024</b>                  | <b>0.004</b>          | 0.161               | <b>0.032</b>           |
| <i>CPE</i>    | rs2280322       | 4                 | 166785899  | <b>0.031</b>            | <b>0.027</b>            | <b>0.044</b>              | 0.308        | <b>0.017</b>                  | <b>0.003</b>          | 0.130               | <b>0.030</b>           |
| <i>GHRL</i>   | rs3755777       | 3                 | 10308364   | 0.190                   | 0.563                   | 0.089                     | <b>0.046</b> | 0.139                         | 0.352                 | 0.135               | 0.149                  |
| <i>GHSR</i>   | rs560994        | 3                 | 173636722  | 0.681                   | 0.615                   | 0.489                     | 0.548        | 0.686                         | <b>0.004</b>          | 0.981               | 0.558                  |
| <i>GHSR</i>   | rs558572        | 3                 | 173639812  | 0.253                   | <b>0.037</b>            | 0.052                     | <b>0.045</b> | 0.191                         | <b>0.035</b>          | 0.300               | 0.077                  |
| <i>GHSR</i>   | rs4144707       | 3                 | 173641907  | 0.726                   | 0.644                   | 0.436                     | 0.612        | 0.769                         | <b>0.004</b>          | 0.962               | 0.599                  |
| <i>GHSR</i>   | rs572169        | 3                 | 173648429  | 0.411                   | 0.770                   | 0.101                     | 0.488        | 0.631                         | <b>0.026</b>          | 0.771               | 0.254                  |
| <i>GHSR</i>   | rs495225        | 3                 | 173648735  | 0.726                   | 0.644                   | 0.436                     | 0.612        | 0.769                         | <b>0.004</b>          | 0.962               | 0.599                  |
| <i>GHSR</i>   | rs2922126       | 3                 | 173649963  | 0.283                   | 0.184                   | <b>0.036</b>              | 0.069        | 0.255                         | <b>0.0002</b>         | 0.525               | 0.064                  |
| <i>GHSR</i>   | rs11918879      | 3                 | 173655071  | 0.600                   | 0.381                   | 0.206                     | 0.335        | 0.493                         | <b>0.001</b>          | 0.928               | 0.310                  |
| <i>GHSR</i>   | rs863441        | 3                 | 173657776  | 0.485                   | 0.824                   | 0.095                     | 0.590        | 0.691                         | <b>0.030</b>          | 0.785               | 0.288                  |

| <i>Gene</i>  | <i>SNP Name</i> | <i>Chromosome</i> | <i>Map</i> | <i>percent body fat</i> | <i>triceps skinfold</i> | <i>abdominal skinfold</i> | <i>BMI</i>   | <i>Sub-scapular-skinfold</i> | <i>thigh skinfold</i> | <i>waist circum</i> | <i>Composite Score</i> |
|--------------|-----------------|-------------------|------------|-------------------------|-------------------------|---------------------------|--------------|------------------------------|-----------------------|---------------------|------------------------|
| <i>GCG</i>   | rs1990761       | 2                 | 162823210  | <b>0.042</b>            | 0.058                   | 0.096                     | <b>0.041</b> | <b>0.018</b>                 | <b>0.045</b>          | <b>0.032</b>        | <b>0.034</b>           |
| <i>GLP1R</i> | rs7738586       | 6                 | 39115518   | <b>0.025</b>            | <b>0.030</b>            | <b>0.022</b>              | <b>0.012</b> | <b>0.026</b>                 | <b>0.008</b>          | <b>0.039</b>        | <b>0.004</b>           |
| <i>GLP1R</i> | rs9380825       | 6                 | 39118941   | 0.217                   | 0.170                   | 0.224                     | 0.088        | 0.257                        | 0.756                 | 0.191               | 0.155                  |
| <i>GLP1R</i> | rs2268657       | 6                 | 39128520   | <b>0.036</b>            | <b>0.023</b>            | 0.067                     | 0.062        | <b>0.048</b>                 | 0.228                 | 0.058               | <b>0.011</b>           |
| <i>GLP1R</i> | rs6923761       | 6                 | 39142050   | <b>0.044</b>            | 0.379                   | 0.320                     | 0.880        | 0.304                        | 0.584                 | 0.372               | 0.376                  |
| <i>GLP1R</i> | rs2143733       | 6                 | 39169474   | 0.079                   | 0.085                   | 0.074                     | 0.122        | 0.112                        | 0.259                 | 0.177               | <b>0.032</b>           |
| <i>HTR2A</i> | rs1923885       | 13                | 46321087   | 0.123                   | 0.165                   | <b>0.042</b>              | 0.295        | 0.317                        | 0.083                 | 0.331               | 0.084                  |
| <i>HTR2C</i> | rs7055144       | 13                | 113699082  | 0.517                   | 0.795                   | 0.649                     | 0.515        | 0.322                        | <b>0.050</b>          | 0.293               | 0.495                  |
| <i>JAK2</i>  | rs3808850       | 9                 | 4973311    | 0.411                   | 0.196                   | 0.669                     | 0.268        | 0.199                        | 0.560                 | 0.357               | 0.248                  |
| <i>JAK2</i>  | rs1327493       | 9                 | 4983082    | 0.446                   | 0.610                   | <b>0.012</b>              | 0.289        | 0.546                        | 0.476                 | 0.432               | 0.331                  |
| <i>JAK2</i>  | rs2230722       | 9                 | 5040706    | 0.291                   | 0.260                   | 0.118                     | 0.650        | 0.460                        | 0.198                 | 0.579               | 0.227                  |
| <i>JAK2</i>  | rs1536800       | 9                 | 5045434    | 0.085                   | <b>0.036</b>            | <b>0.046</b>              | 0.078        | 0.210                        | <b>0.044</b>          | 0.211               | 0.052                  |
| <i>LEPR</i>  | hCV1928197      | 1                 | 65960323   | 0.283                   | <b>0.016</b>            | 0.270                     | 0.095        | 0.163                        | <b>0.046</b>          | 0.466               | 0.119                  |
| <i>LEPR</i>  | hCV1928241      | 1                 | 66033405   | 0.315                   | <b>0.028</b>            | 0.410                     | 0.094        | 0.246                        | 0.194                 | 0.401               | 0.177                  |
| <i>MC4R</i>  | MC4R178         | 18                | 56192751   | 0.146                   | 0.236                   | 0.169                     | <b>0.017</b> | 0.392                        | <b>0.047</b>          | 0.269               | <b>0.043</b>           |
| <i>MC4R</i>  | rs1943232       | 18                | 56245389   | 0.253                   | <b>0.020</b>            | 0.469                     | 0.358        | 0.110                        | 0.070                 | 0.342               | 0.179                  |
| <i>NPY1R</i> | rs1574637       | 4                 | 164599697  | 0.340                   | 0.082                   | 0.294                     | 0.120        | 0.323                        | <b>0.048</b>          | 0.388               | 0.116                  |
| <i>NPY5R</i> | rs6837793       | 4                 | 164614340  | 0.339                   | 0.082                   | 0.283                     | 0.117        | 0.322                        | <b>0.048</b>          | 0.384               | 0.114                  |
| <i>NPY5R</i> | rs4234955       | 4                 | 164617881  | 0.165                   | <b>0.022</b>            | 0.298                     | 0.168        | 0.075                        | 0.160                 | 0.124               | 0.077                  |
| <i>PLIN</i>  | rs2304794       | 15                | 88014138   | 0.415                   | <b>0.031</b>            | <b>0.029</b>              | 0.121        | 0.187                        | 0.078                 | 0.379               | 0.178                  |
| <i>PLIN</i>  | rs6496589       | 15                | 88014233   | 0.415                   | <b>0.031</b>            | <b>0.029</b>              | 0.121        | 0.187                        | 0.078                 | 0.379               | 0.178                  |
| <i>PLIN</i>  | rs2289487       | 15                | 88018100   | 0.283                   | 0.182                   | 0.674                     | 0.487        | <b>0.033</b>                 | 0.268                 | 0.150               | 0.292                  |
| <i>SOCS3</i> | rs8074003       | 17                | 73876088   | 0.239                   | 0.328                   | 0.170                     | 0.573        | 0.051                        | 0.130                 | <b>0.017</b>        | 0.200                  |
| <i>STAT3</i> | rs2272087       | 17                | 37713088   | 0.907                   | 0.791                   | 0.955                     | 0.846        | 0.861                        | <b>0.019</b>          | 0.868               | 0.801                  |
| <i>STAT3</i> | rs16967659      | 17                | 37713263   | 0.906                   | 0.783                   | 0.958                     | 0.822        | 0.860                        | <b>0.019</b>          | 0.854               | 0.781                  |
| <i>STAT3</i> | rs1053023       | 17                | 37719142   | 0.906                   | 0.783                   | 0.958                     | 0.822        | 0.860                        | <b>0.019</b>          | 0.854               | 0.781                  |
| <i>STAT3</i> | rs1053005       | 17                | 37719436   | 0.961                   | 0.838                   | 0.936                     | 0.704        | 0.937                        | <b>0.014</b>          | 0.918               | 0.840                  |
| <i>STAT3</i> | rs2306580       | 17                | 37745206   | 0.699                   | 0.723                   | 0.844                     | 0.951        | 0.449                        | <b>0.013</b>          | 0.629               | 0.730                  |
| <i>TUB</i>   | rs4758272       | 11                | 8009735    | 0.081                   | 0.059                   | 0.133                     | 0.376        | <b>0.019</b>                 | 0.515                 | 0.218               | 0.080                  |
| <i>TUB</i>   | rs1406094       | 11                | 8018502    | <b>0.015</b>            | 0.223                   | 0.237                     | 0.082        | <b>0.002</b>                 | 0.932                 | <b>0.009</b>        | 0.052                  |
| <i>TUB</i>   | rs7949880       | 11                | 8029812    | <b>0.023</b>            | <b>0.031</b>            | 0.085                     | 0.362        | <b>0.005</b>                 | 0.350                 | 0.094               | <b>0.048</b>           |

| <i>Gene</i> | SNP Name   | Chromosome | Map     | percent body fat | triceps skinfold | abdominal skinfold | BMI   | Sub-scapular-skinfold | thigh skinfold | waist circum | Composite Score |
|-------------|------------|------------|---------|------------------|------------------|--------------------|-------|-----------------------|----------------|--------------|-----------------|
| <i>TUB</i>  | rs11041723 | 11         | 8035280 | 0.063            | 0.107            | 0.122              | 0.574 | <b>0.012</b>          | 0.572          | 0.190        | 0.112           |
| <i>TUB</i>  | rs2280726  | 11         | 8039305 | <b>0.023</b>     | <b>0.031</b>     | 0.085              | 0.362 | <b>0.005</b>          | 0.350          | 0.094        | <b>0.048</b>    |
| <i>TUB</i>  | rs2242503  | 11         | 8075048 | 0.145            | 0.264            | <b>0.047</b>       | 0.316 | 0.288                 | <b>0.033</b>   | 0.422        | 0.175           |
| <i>TUB</i>  | rs1055233  | 11         | 8084071 | 0.304            | <b>0.041</b>     | 0.175              | 0.134 | 0.278                 | 0.262          | 0.413        | 0.107           |
| <i>TUB</i>  | rs1569128  | 11         | 8089461 | 0.369            | <b>0.046</b>     | 0.214              | 0.140 | 0.319                 | 0.300          | 0.452        | 0.125           |

**Table S3.** Genes associated with obesity in Yup'ik participants using all SNPs genotyped within the gene. **For none of the genes were the FDR values less than 0.05.** There was no significant p-value corresponding to the phenotype subscapular-skinfold.

| Phenotype           | ADIPOQ      |                |                         | MC4R        |                     |             | NPY5R          |                         |             | TUB                 |                |       |
|---------------------|-------------|----------------|-------------------------|-------------|---------------------|-------------|----------------|-------------------------|-------------|---------------------|----------------|-------|
|                     | Raw p-value | R <sup>2</sup> | Adjusted R <sup>2</sup> | Raw p-value | R <sup>2</sup>      | Raw p-value | R <sup>2</sup> | Adjusted R <sup>2</sup> | Raw p-value | Raw p-value         | R <sup>2</sup> |       |
| Percent bodyfat     | 0.04        | 0.071          | 0.026                   | 0.14        | Percent bodyfat     | 0.04        | 0.071          | 0.026                   | 0.14        | Percent bodyfat     | 0.04           | 0.071 |
| Triceps skinfold    | 0.21        | 0.055          | 0.010                   | 0.04        | Triceps skinfold    | 0.21        | 0.055          | 0.010                   | 0.04        | Triceps skinfold    | 0.21           | 0.055 |
| Abdominal skinfold  | 0.51        | 0.044          | -0.002                  | 0.54        | Abdominal skinfold  | 0.51        | 0.044          | -0.002                  | 0.54        | Abdominal skinfold  | 0.51           | 0.044 |
| BMI                 | 0.11        | 0.061          | 0.017                   | 0.08        | BMI                 | 0.11        | 0.061          | 0.017                   | 0.08        | BMI                 | 0.11           | 0.061 |
| Thigh skinfold      | 0.63        | 0.041          | -0.005                  | 0.14        | Thigh skinfold      | 0.63        | 0.041          | -0.005                  | 0.14        | Thigh skinfold      | 0.63           | 0.041 |
| Waist circumference | 0.02        | 0.074          | 0.031                   | 0.12        | Waist circumference | 0.02        | 0.074          | 0.031                   | 0.12        | Waist circumference | 0.02           | 0.074 |
| Composite Score     | 0.10        | 0.061          | 0.018                   | 0.07        | Composite Score     | 0.10        | 0.061          | 0.018                   | 0.07        | Composite Score     | 0.10           | 0.061 |

**Table S4.** Summary of the ten pairwise interactions with the highest posterior probability of true positive interaction association.

| <i>Gene × gene</i>   | <i>SNP × SNP</i>          | <i>Observed p-value</i> | <i>Posterior probability of true positive</i> |
|----------------------|---------------------------|-------------------------|-----------------------------------------------|
| <i>TUB × JAK2</i>    | rs11041723 x<br>rs2274471 | $6.1 \times 10^{-05}$   | 0.31                                          |
| <i>BBS8 × GLPIR</i>  | rs17700296 x<br>rs2268641 | $7.0 \times 10^{-05}$   | 0.31                                          |
| <i>CPE × APM1</i>    | rs1866217 x rs3774261     | $1.0 \times 10^{-04}$   | 0.31                                          |
| <i>LEPR × LEPR</i>   | rs3790423 x rs3790439     | $1.2 \times 10^{-04}$   | 0.31                                          |
| <i>MC4R × APM1</i>   | rs1543915 x rs3774261     | $1.2 \times 10^{-04}$   | 0.31                                          |
| <i>LEPR × LEPR</i>   | rs3790422 x rs3790439     | $1.3 \times 10^{-04}$   | 0.31                                          |
| <i>NPY5R × GLP1R</i> | Y5R1c52 x rs9380825       | $1.3 \times 10^{-04}$   | 0.31                                          |
| <i>TUB × SOCS3</i>   | rs4758289 x rs4969168     | $2.3 \times 10^{-04}$   | 0.31                                          |
| <i>JAK2 × JAK2</i>   | rs10491652 x<br>rs1410779 | $2.6 \times 10^{-04}$   | 0.31                                          |
| <i>GHRL × CPE</i>    | rs3755777 x rs6536912     | $2.6 \times 10^{-04}$   | 0.31                                          |

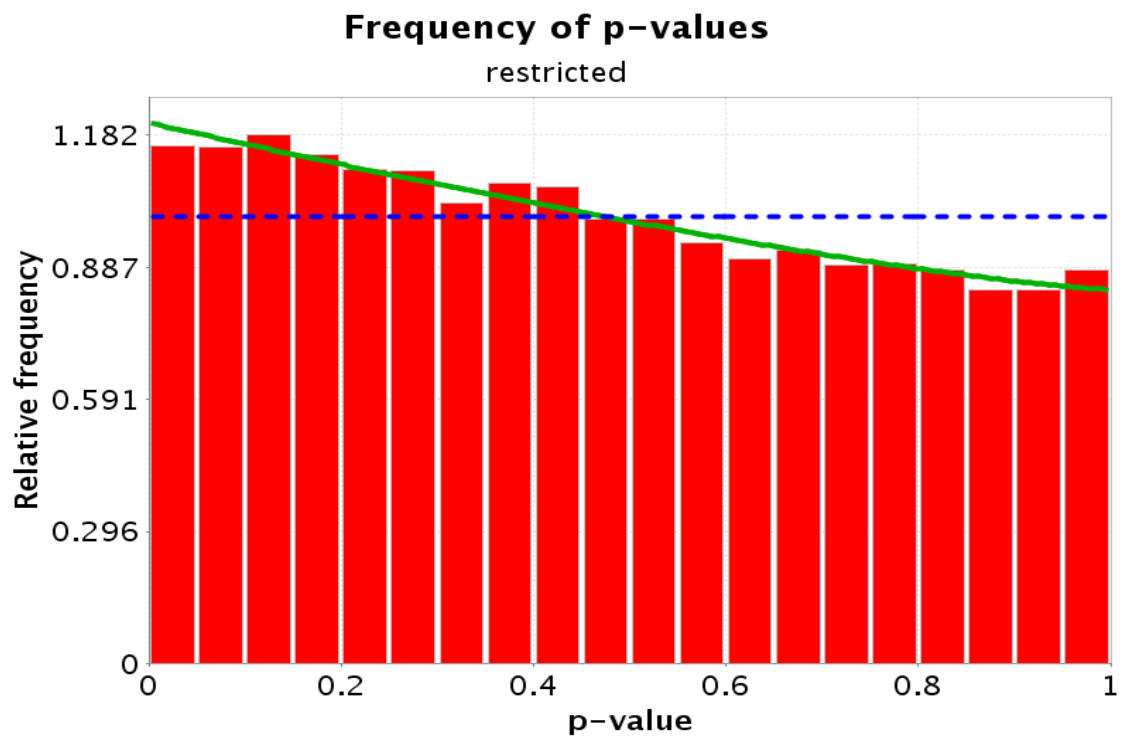

**Supplemental Figure 1.** The proportion of pairwise interaction tests. The proportion of truly null hypotheses is represented by the area under the green solid line and the blue broken horizontal line. This area is approximately 16 % of the total area.
